# Supplementary material for: PAQR6 Upregulation Is Associated with AR Signaling and Unfavorite Prognosis in Prostate Cancers
Source: MDPI journal article supplement (doi:10.3390/biom11091383), 2021-09-18
Supplement: s1 [file s1]

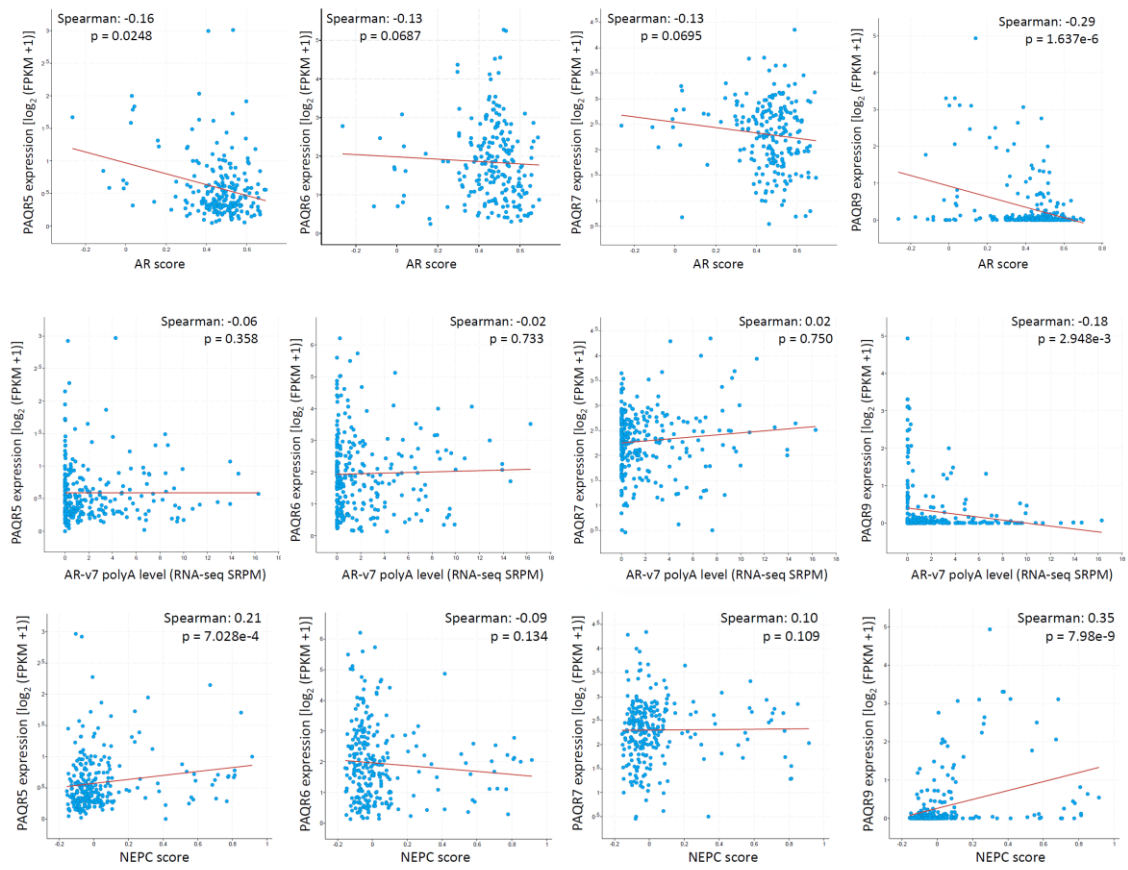

**Supplemental Figure S1.** Correlations of PAQR genes with NEPC score, AR score and AR-v7 expression. Spearman correlations were analyzed using the RNA-seq dataset generated from metastatic prostate cancers, as described.
